# Supplementary material for: Novel Electrospun Polylactic Acid Nanocomposite Fiber Mats with Hybrid Graphene Oxide and Nanohydroxyapatite Reinforcements Having Enhanced Biocompatibility
Source: Polymers (Basel). 2016 Aug 8;8(8):287. doi: 10.3390/polym8080287 (PMC6432366; doi:10.3390/polym8080287)
Supplement: Supplementary file 1 [file polymers-08-00287-s001.pdf]

# Supplementary Materials: Novel Electrospun Polylactic Acid Nanocomposite Fiber Mats with Hybrid Graphene Oxide and Nanohydroxyapatite Reinforcements Having Enhanced Biocompatibility

Chen Liu, Hoi Man Wong, Kelvin Wai Kwok Yeung and Sie Chin Tjong

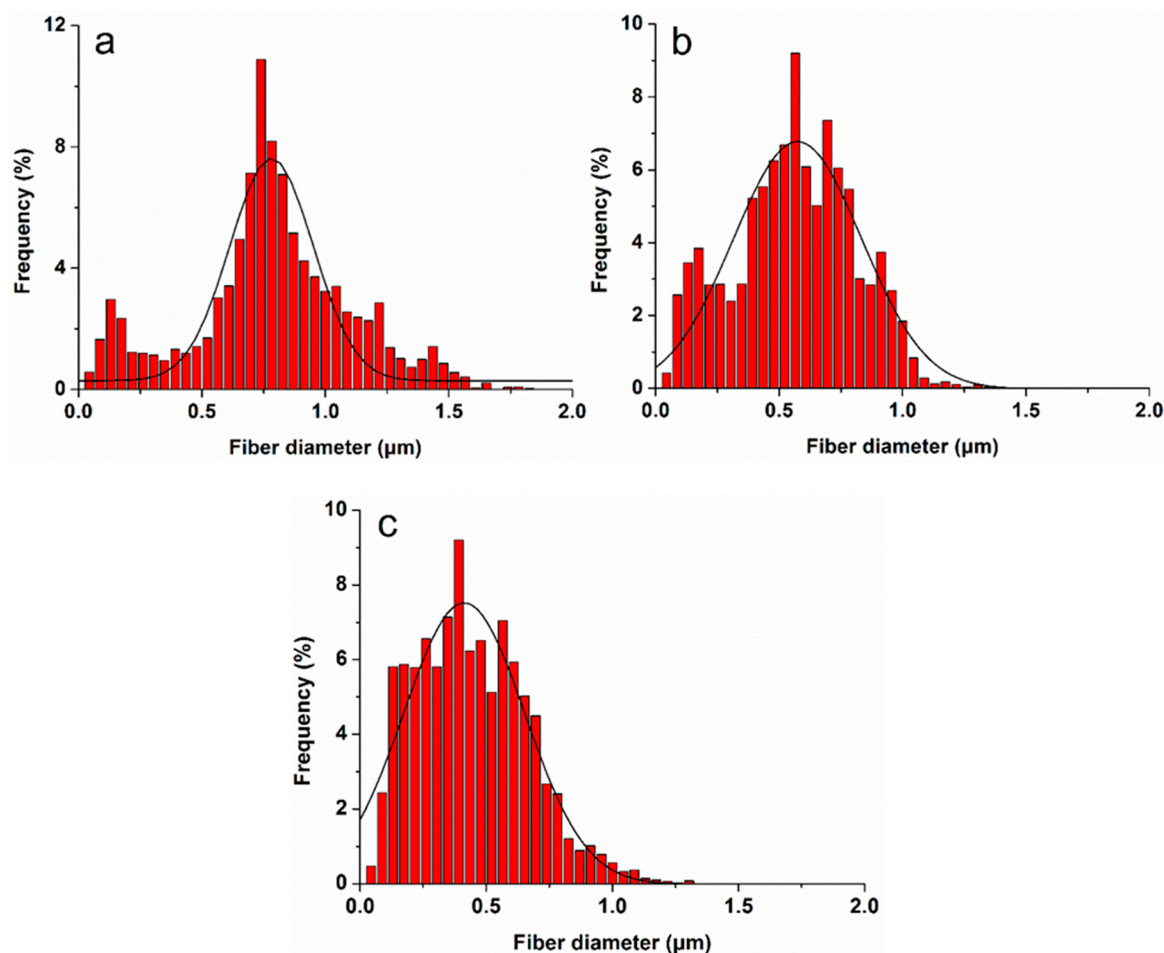

**Figure S1.** Fiber diameter distribution of electrospun (a) PLA, (b) PLA/15%nHA and (c) PLA/15%nHA-3%GO fibrous mats determined by ImageJ software.

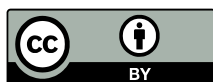

© 2016 by the authors; licensee MDPI, Basel, Switzerland. This article is an open access article distributed under the terms and conditions of the Creative Commons Attribution (CC-BY) license (<http://creativecommons.org/licenses/by/4.0/>).
